# Supplementary material
Source: Springer Nature journal article supplement (https://www.springermedizin.de/resource/supplementary/12936_2007_420_MOESM4_ESM.pdf/9547410)
Supplement: MOESM4 [file 9547410]

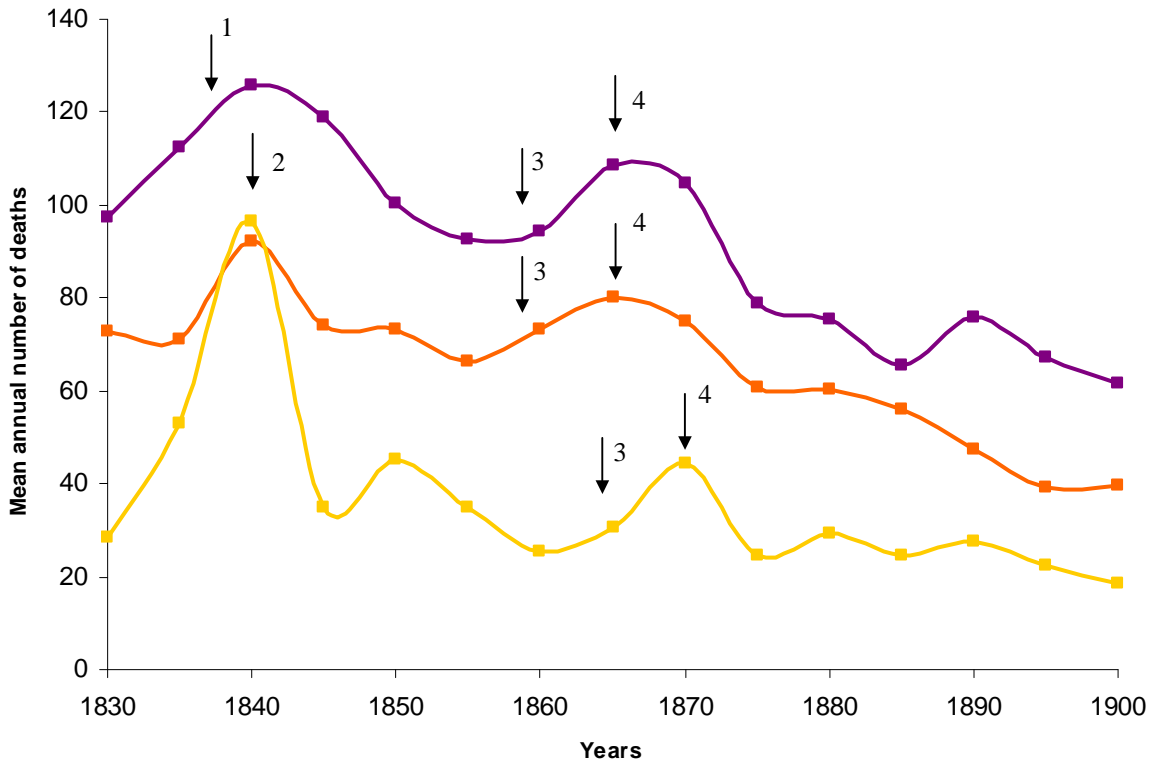

- Villages of Aiton, Chamousset, Chamoux, Bourgneuf
- Villages of Grésy-sur-Isère, Fréterive
- Villages of Notre-Dame-des-Millières, Sainte-Hélène-sur-Isère
